# Supplementary material for: The post-diapause vibrational behavior, motility, and survival of the brown marmorated stink bug Halyomorpha halys (Stål) adults at different temperatures
Source: PubMed Central journal article supplement (PMC10786867; doi:10.1038/s41598-023-50480-y), 2024-01-12
Supplement: 41598_2023_50480_MOESM1_ESM.pdf [file 41598_2023_50480_MOESM1_ESM.pdf]

# The post-diapause vibrational behavior, motility, and survival of the brown marmorated stink bug *Halyomorpha halys* (Stål) adults at different temperatures

Jalal M. Fouani, Marica Scala, Valentina Zaffaroni-Caorsi, Vincenzo Verrastro, Gianfranco Anfora, & Valerio Mazzoni

## Supplementary materials

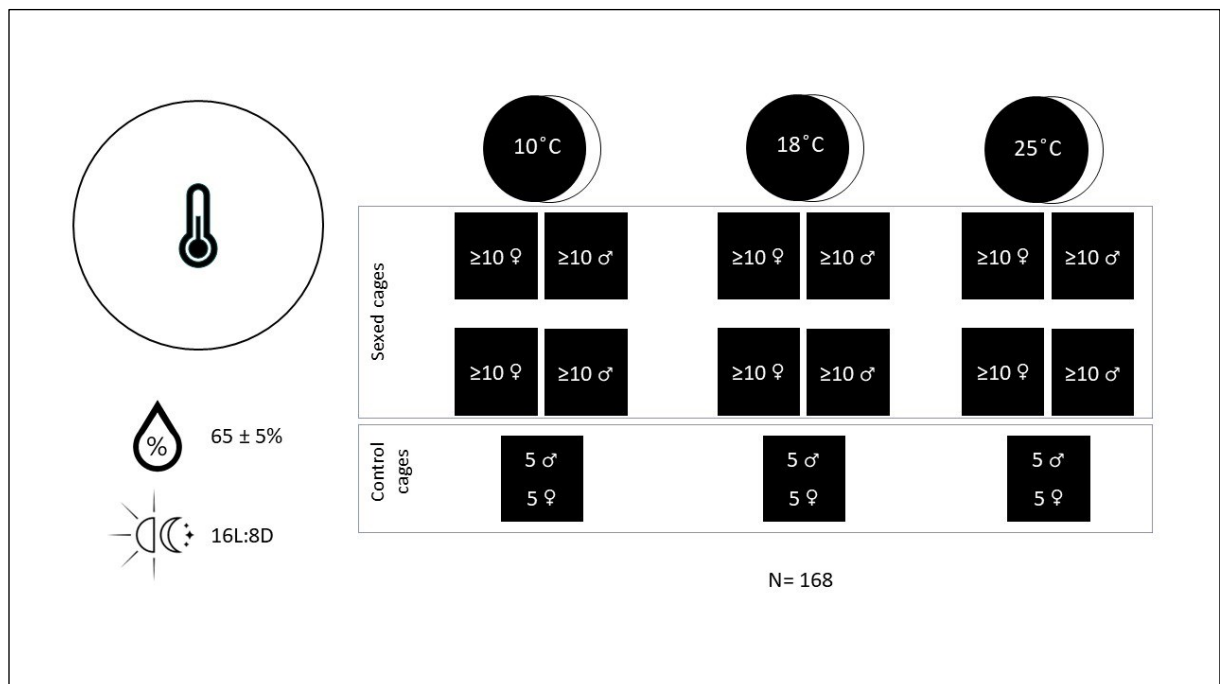

**Figure S1.** The total sample size used for the experiment and the allocation of sexed insects for each temperature treatment. The sexed cages contained at least 10 insects (maximum of 12 insects), whereas control cages (CCg) contained 5 males and 5 females each. The recording of single (SCg) and joined (JCg) cages was performed on the sexed cages.

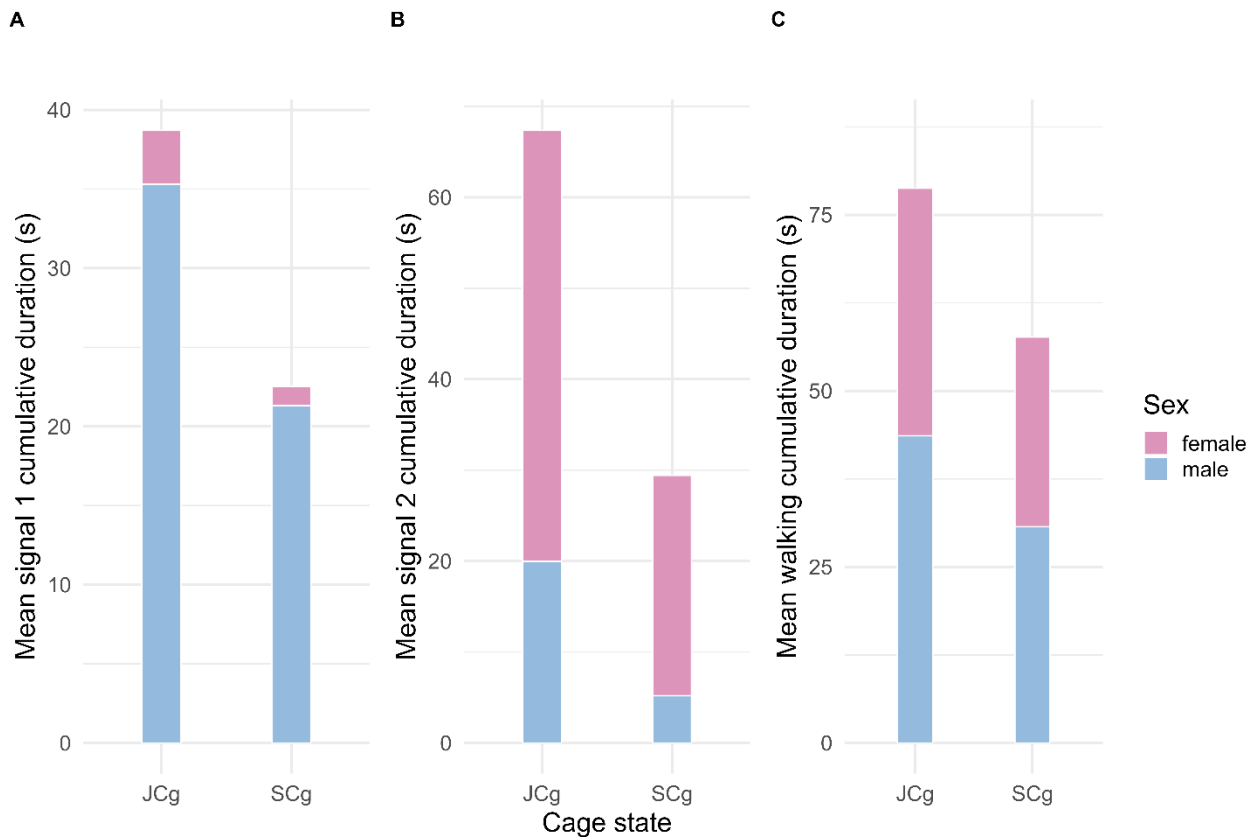

**Figure S2.** The differences in emitting (A) signal 1, (B) signal 2, and in (C) walking for males and females in joined (JCg) and separated cages (SCg). Females spent significantly higher cumulative periods emitting signal 1 in JCg compared to SCg ( $\chi^2 = 12.21$ ,  $df=1$ ,  $p < 0.001$ ). Both females ( $\chi^2 = 10.46$ ,  $df=1$ ,  $p < 0.001$ ) and males ( $\chi^2 = 7.1891$ ,  $df=1$ ,  $p < 0.01$ ) spent significantly higher cumulative periods emitting signal 2 in JCg. Only males spent significantly higher walking cumulative periods in JCg ( $\chi^2 = 4.23$ ,  $df=1$ ,  $p=0.04$ ).

**Table S1.** Survival table of *Halyomorpha halys* among three different categories of temperature for each sex.

†: Days. NA: Not Available. OS: Overall Survival.

| Sex     | Temperature | Number at risk (Number of events) | Median OS† (95% CI) |
|---------|-------------|-----------------------------------|---------------------|
| Males   | 10°C        | 17 (17)                           | 23 (23 - NA)        |
| Males   | 15°C        | 15 (15)                           | 18 (18 - 21)        |
| Males   | 24°C        | 18 (18)                           | 4.5 (3 - 8)         |
| Females | 10°C        | 21 (21)                           | 23 (23 - NA)        |
| Females | 15°C        | 16 (16)                           | 18 (14 - 26)        |
| Females | 24°C        | 20 (20)                           | 3 (3 - 5)           |

**Table S2.** Parameters' input for the batch detector feature of Raven Pro 1.6.1. (A) represents the input for Walking detection whereas (B) represents the input for Female signal 2 (FS2) detection.

| <b>(A) Walking parameters</b> |                    |             |                |               |           |
|-------------------------------|--------------------|-------------|----------------|---------------|-----------|
| "Target" window               | Min freq           | 300 (Hz)    | "Noise" window | Min occupancy | 80%       |
|                               | Max freq           | 4096 (Hz)   |                | SnR threshold | 7.0 above |
|                               | Min duration       | 0.03125 (s) |                | Block size    | 3 (s)     |
|                               | Max duration       | 3 (s)       |                | Hop size      | 2 (s)     |
|                               | Minimum Separation | 0.03125 (s) |                | Percentile    | 20.0      |

| <b>(B) FS2 parameters</b> |                    |             |                |               |           |
|---------------------------|--------------------|-------------|----------------|---------------|-----------|
| "Target" window           | Min freq           | 20 (Hz)     | "Noise" window | Min occupancy | 70%       |
|                           | Max freq           | 240 (Hz)    |                | SnR threshold | 6.0 above |
|                           | Min duration       | 0.09375 (s) |                | Block size    | 3 (s)     |
|                           | Max duration       | 1.8125 (s)  |                | Hop size      | 2 (s)     |
|                           | Minimum separation | 0.125 (s)   |                | Percentile    | 20.0      |
